# Supplementary material for: A Novel Mono-surface Antisymmetric 8Tx/16Rx Coil Array for Parallel Transmit Cardiac MRI in Pigs at 7T
Source: PubMed Central journal article supplement (PMC7033245; doi:10.1038/s41598-020-59949-6), 2020-02-20
Supplement: 41598_2020_59949_MOESM1_ESM.pdf [file 41598_2020_59949_MOESM1_ESM.pdf]

# A Novel Mono-surface Antisymmetric 8Tx/16Rx Coil Array for Parallel Transmit Cardiac MRI in Pigs at 7T

Ibrahim A. Elabyad, Maxim Terekhov, David Lohr, Maria R. Stefanescu, Steffen  
Baltes, and Laura M. Schreiber

Chair of Cellular and Molecular Imaging, Comprehensive Heart Failure Center (CHFC), University Hospital  
Wuerzburg, D-97078 Wuerzburg, Germany

**Table S1.** Simulated (yellow) and measured S-Matrix in dB for the mono-surface array loaded with a 20 cm diameter spherical phantom with  $\epsilon_r = 59.3$  and  $\sigma = 0.79$  S/m.

| El.# | 1   | 2   | 3    | 4    | 5   | 6   | 7    | 8    | 9    | 10   | 11   | 12   | 13   | 14   | 15   | 16   | El.# |
|------|-----|-----|------|------|-----|-----|------|------|------|------|------|------|------|------|------|------|------|
|      | -12 | -18 | -16  | -12  | -21 | -13 | -25  | -26  | -22  | -18  | -27  | -23  | -24  | -25  | -26  | -38  | 1    |
|      |     | -16 | -16  | -18  | -16 | -26 | -17  | -22  | -16  | -22  | -24  | -32  | -21  | -25  | -33  | -23  | 2    |
| 1    | -10 |     | -17  | -18  | -16 | -26 | -10  | -26  | -16  | -22  | -15  | -28  | -21  | -25  | -33  | -27  | 3    |
| 2    | -17 | -10 |      | -16  | -24 | -16 | -37  | -13  | -22  | -10  | -31  | -12  | -29  | -25  | -34  | -34  | 4    |
| 3    | -18 | -12 | -14  |      | -23 | -20 | -13  | -27  | -11  | -27  | -48  | -26  | -15  | -42  | -17  | -40  | 5    |
| 4    | -12 | -18 | -21  | -14  |     | -26 | -26  | -25  | -28  | -15  | -42  | -24  | -27  | -19  | -30  | -19  | 6    |
| 5    | -20 | -13 | -16  | -27  | -21 |     | -9.0 | -35  | -18  | -30  | -10  | -30  | -14  | -27  | -14  | -28  | 7    |
| 6    | -13 | -20 | -27  | -16  | -20 | -21 |      | -12  | -32  | -9.0 | -47  | -10  | -30  | -13  | -29  | -14  | 8    |
| 7    | -24 | -32 | -12  | -28  | -16 | -28 | -21  |      | -10  | -30  | -23  | -29  | -10  | -31  | -9.0 | -35  | 9    |
| 8    | -32 | -24 | -28  | -12  | -28 | -16 | -30  | -22  |      | -10  | -40  | -14  | -43  | -12  | -37  | -11  | 10   |
| 9    | -19 | -17 | -9.0 | -23  | -15 | -23 | -11  | -25  | -15  |      | -9.0 | -31  | -9.0 | -31  | -14  | -28  | 11   |
| 10   | -17 | -19 | -23  | -9.0 | -23 | -15 | -25  | -11  | -27  | -15  |      | -11  | -34  | -9.0 | -40  | -12  | 12   |
| 11   | -22 | -23 | -15  | -28  | -19 | -25 | -8.0 | -29  | -16  | -40  | -17  |      | -8.0 | -33  | -8.0 | -41  | 13   |
| 12   | -23 | -22 | -28  | -15  | -25 | -19 | -29  | -8.0 | -40  | -16  | -34  | -17  |      | -14  | -44  | -9.0 | 14   |
| 13   | -22 | -21 | -24  | -29  | -25 | -32 | -12  | -25  | -10  | -29  | -8.0 | -40  | -15  |      | -10  | -31  | 15   |
| 14   | -21 | -22 | -29  | -25  | -32 | -25 | -25  | -12  | -29  | -10  | -40  | -8.0 | -30  | -15  |      | -15  | 16   |
| 15   | -27 | -33 | -19  | -28  | -18 | -42 | -10  | -29  | -8.0 | -41  | -20  | -29  | -8.0 | -43  | -22  |      |      |
| 16   | -33 | -27 | -28  | -19  | -43 | -18 | -29  | -11  | -41  | -9.0 | -29  | -20  | -43  | -8.0 | -39  | -22  |      |
|      | 1   | 2   | 3    | 4    | 5   | 6   | 7    | 8    | 9    | 10   | 11   | 12   | 13   | 14   | 15   | 16   |      |

**Table S2.** Measured S-Matrix in dB for the mono-surface array loaded with a 46 kg cadaver pig.

| El.# | 1   | 2   | 3   | 4   | 5   | 6   | 7   | 8   | 9   | 10  | 11  | 12  | 13  | 14  | 15  | 16  |
|------|-----|-----|-----|-----|-----|-----|-----|-----|-----|-----|-----|-----|-----|-----|-----|-----|
| 1    | -17 |     |     |     |     |     |     |     |     |     |     |     |     |     |     |     |
| 2    | -13 | -23 |     |     |     |     |     |     |     |     |     |     |     |     |     |     |
| 3    | -18 | -12 | -19 |     |     |     |     |     |     |     |     |     |     |     |     |     |
| 4    | -15 | -20 | -18 | -15 |     |     |     |     |     |     |     |     |     |     |     |     |
| 5    | -19 | -11 | -13 | -21 | -28 |     |     |     |     |     |     |     |     |     |     |     |
| 6    | -11 | -26 | -24 | -15 | -19 | -24 |     |     |     |     |     |     |     |     |     |     |
| 7    | -28 | -15 | -11 | -37 | -16 | -33 | -20 |     |     |     |     |     |     |     |     |     |
| 8    | -23 | -25 | -24 | -13 | -27 | -21 | -57 | -18 |     |     |     |     |     |     |     |     |
| 9    | -22 | -19 | -23 | -25 | -12 | -35 | -21 | -33 | -15 |     |     |     |     |     |     |     |
| 10   | -20 | -20 | -18 | -15 | -35 | -15 | -30 | -16 | -28 | -20 |     |     |     |     |     |     |
| 11   | -39 | -26 | -18 | -52 | -22 | -30 | -13 | -40 | -32 | -33 | -17 |     |     |     |     |     |
| 12   | -34 | -37 | -48 | -20 | -30 | -40 | -42 | -13 | -39 | -20 | -38 | -27 |     |     |     |     |
| 13   | -31 | -25 | -36 | -32 | -21 | -32 | -16 | -40 | -15 | -38 | -12 | -44 | -25 |     |     |     |
| 14   | -26 | -31 | -26 | -27 | -35 | -24 | -40 | -17 | -37 | -16 | -36 | -12 | -44 | -21 |     |     |
| 15   | -34 | -40 | -34 | -47 | -35 | -38 | -22 | -45 | -12 | -43 | -22 | -52 | -16 | -48 | -22 |     |
| 16   | -37 | -30 | -34 | -37 | -37 | -22 | -40 | -19 | -44 | -13 | -39 | -17 | -44 | -12 | -45 | -22 |

**Table S3.** Computed optimal amplitudes/phases within the pig body phantom for the 8Tx channels after on-scanner pTx  $B_1^+$  using the vendor integrated pTx shimming algorithm.

| <b>pTx Channel #</b> | <b>Magnitude</b> | <b>Phase [°]</b> |
|----------------------|------------------|------------------|
| $T_{x1}$             | <b>0.40</b>      | <b>00.00</b>     |
| $T_{x2}$             | <b>0.41</b>      | <b>33.68</b>     |
| $T_{x3}$             | <b>0.42</b>      | <b>-98.95</b>    |
| $T_{x4}$             | <b>0.41</b>      | <b>-41.85</b>    |
| $T_{x5}$             | <b>0.41</b>      | <b>-12.14</b>    |
| $T_{x6}$             | <b>0.41</b>      | <b>-69.62</b>    |
| $T_{x7}$             | <b>0.40</b>      | <b>-33.25</b>    |
| $T_{x8}$             | <b>0.41</b>      | <b>-19.95</b>    |
